# Supplementary material
Source: Springer Nature journal article supplement (https://www.springermedizin.de/resource/supplementary/12936_2009_1151_MOESM5_ESM.pdf/9549982)

# Probability of local malarial transmission

High

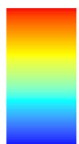

Low

- ▲ Local cases
- ⊙ Imported cases
- △ Local and imported

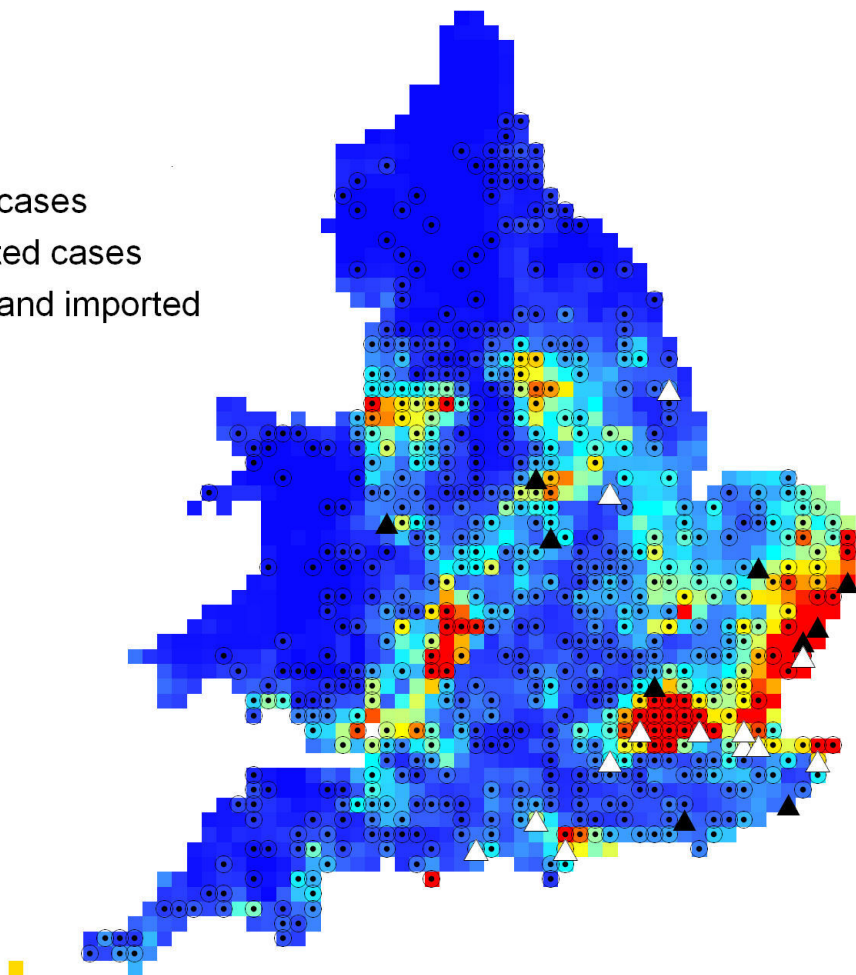

Supplement: MOESM5 [file 9549982]
